# Supplementary material for: Abnormal Neural Progenitor Cells Differentiated from Induced Pluripotent Stem Cells Partially Mimicked Development of TSC2 Neurological Abnormalities
Source: PubMed Central journal article supplement — Stem Cell Reports. 2017 Mar 23;8(4):883–93. doi: 10.1016/j.stemcr.2017.02.020 (PMC5390135; doi:10.1016/j.stemcr.2017.02.020), 2017-03-23
Supplement: mmc1.pdf [file mmc1.pdf]

**Stem Cell Reports, Volume 8**

**Supplemental Information**

**Abnormal Neural Progenitor Cells Differentiated from Induced Pluripotent Stem Cells Partially Mimicked Development of *TSC2* Neurological Abnormalities**

**Yaqin Li, Jiqing Cao, Menglong Chen, Jing Li, Yiming Sun, Yu Zhang, Yuling Zhu, Liang Wang, and Cheng Zhang**

## Supplemental information

### Supplemental Figures and Legends:

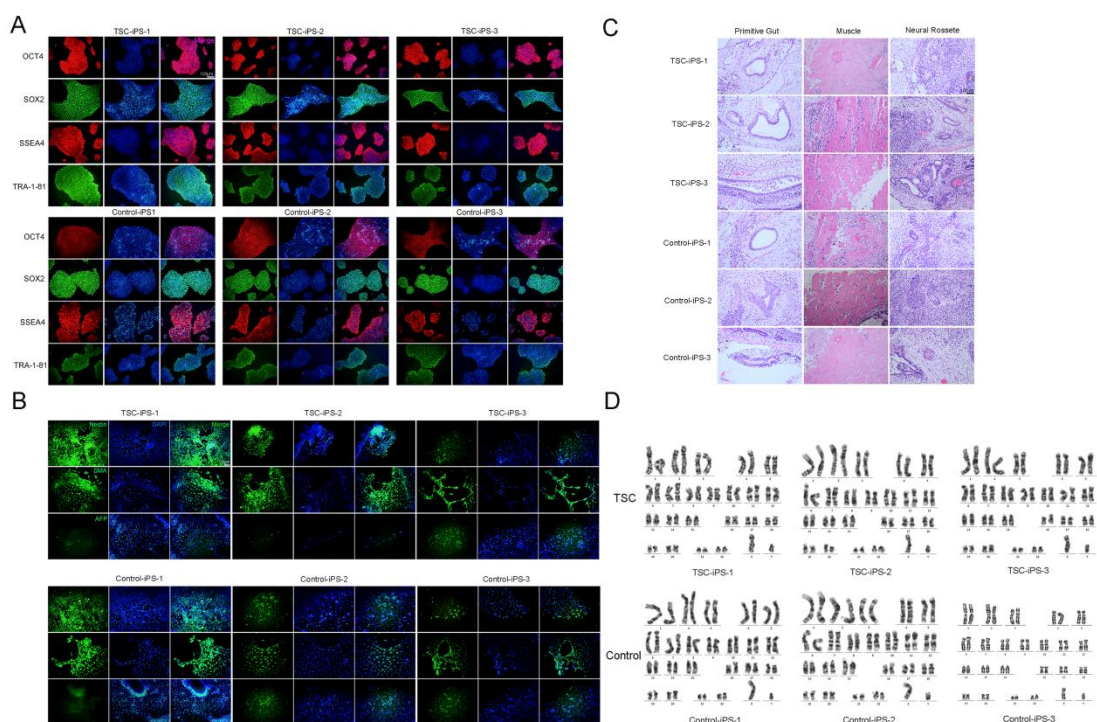

**Fig. S1 Identification of induced pluripotent stem cells (iPSCs) from TSC patient and unaffected controls.**

(A) iPSCs derived from TSC patient and unaffected controls expressed TRA-1-80, SOX2, SSEA4, and OCT4 as demonstrated by immunofluorescence staining. Scale bar: 100  $\mu$ m. (B) Immunofluorescence for the endoderm (alpha-fetoprotein, AFP), mesoderm (smooth muscle actin, SMA), and ectoderm (NESTIN) markers in TSC and unaffected iPSC lines. Scale bar: 50  $\mu$ m. (C) Teratomas of iPSCs derived from TSC patient and unaffected controls showed typical tissues from the three germ layers. Scale bar: 100  $\mu$ m. (D) Karyotype analysis of iPSC lines derived from TSC patient and unaffected controls showed a normal karyotype. The images of TSC-iPS-1 were the same images of Figure 2C,D,E,F.

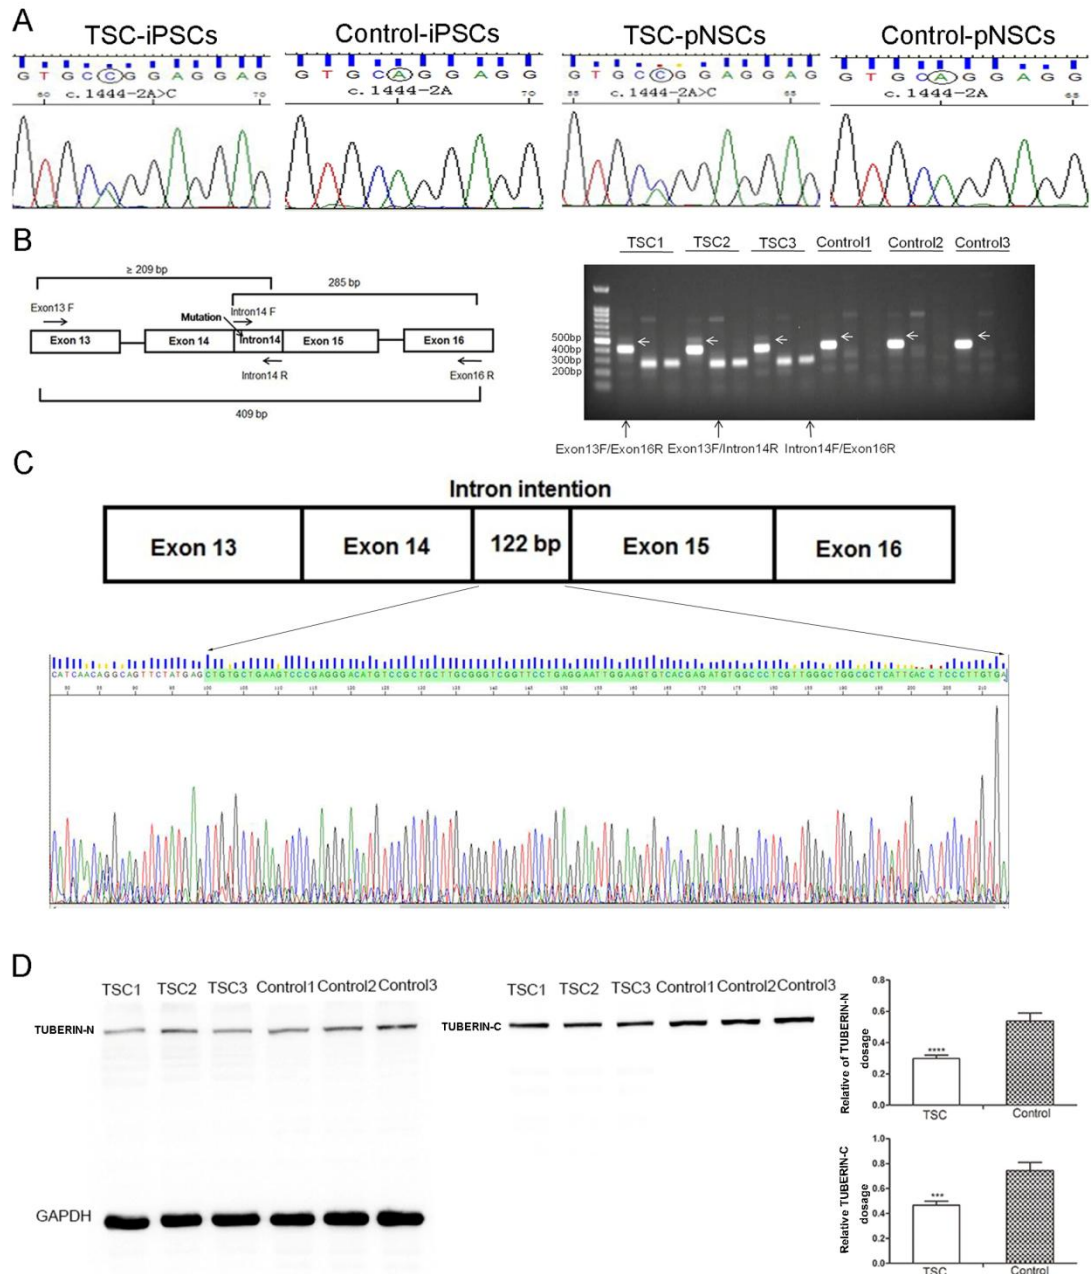

**Fig. S2 Detection of *TSC1/TSC2* gene mutation, aberrant mRNA transcripts, and TUBERIN expression in TSC-pNSCs.**

(A) *TSC1/TSC2* gene sequencing of a TSC patient and unaffected control-specific iPSCs (TSC1 AND Control1 lines) and pNSCs revealed a c.1444-2A>C mutation in TSC-iPSCs and pNSCs. Unaffected control-iPSCs and pNSCs did not have any detectable mutations. (B) and (C) Primer sets used in this study. The set Exon13F/Exon16 was used to amplify both the classical form and the corresponding splice variant, whereas the sets Exon13F/Intron14R and Intron14F/Exon16R were used for the specific amplification of the splice variants. RT-PCR amplification and cDNA sequence chromatograms obtained by Sanger sequencing of *TSC2* using the primer set Exon13F/Intron14R showed that the *TSC2* mRNA sequence was lengthened by 122 bp in the affected individual compared with that in normal controls. (D) Expression of TUBERIN in TSC-pNSCs and control-pNSCs detected by western blotting. Expression levels were normalized to that of glyceraldehyde-3-phosphate (GAPDH) (n = 5 independent

experiments, mean  $\pm$  SEM; \* $p < 0.05$ , \*\* $p < 0.01$ , \*\*\* $p < 0.005$ , \*\*\*\* $p < 0.001$ ; Student's t test).

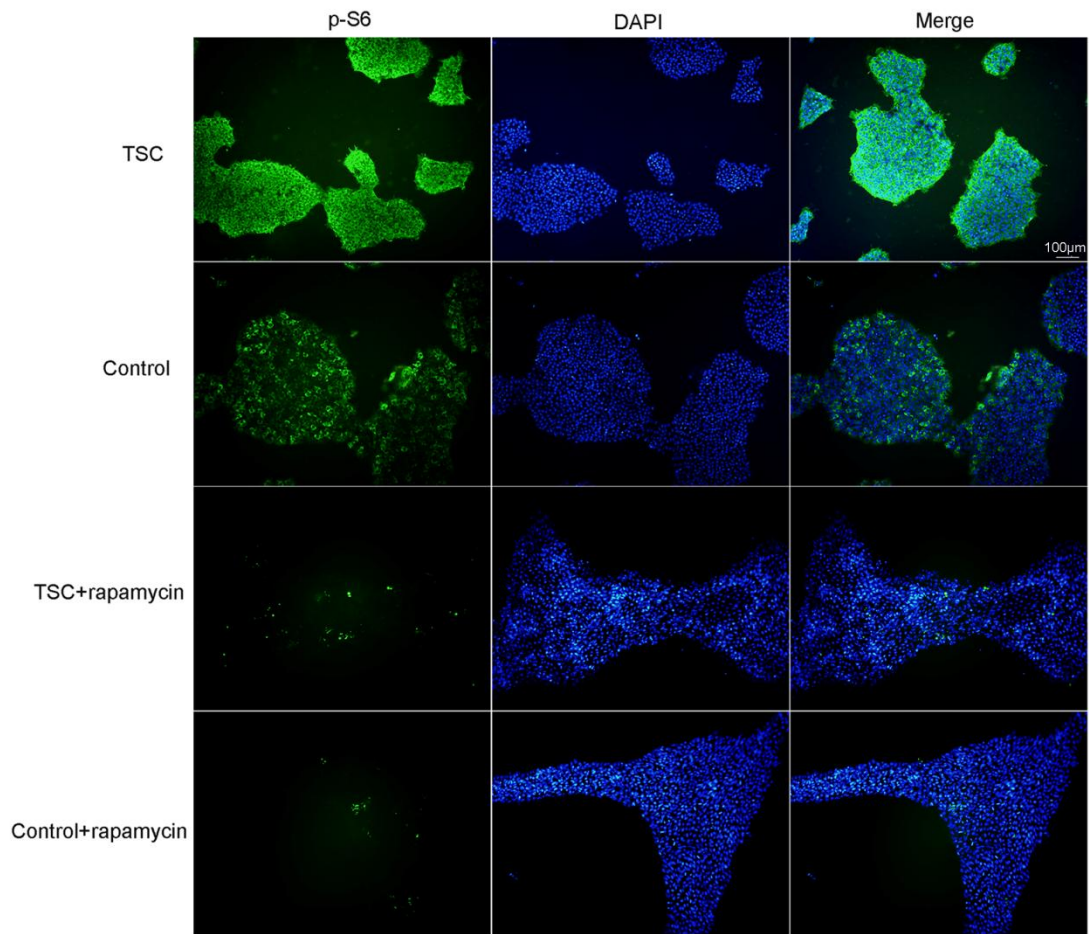

**Fig.S3 mTOR pathway activation of TSC, unaffected controls, and rapamycin-treated iPSCs.**

TSC-iPSCs had an increased expression of pS6 compared with that of unaffected control-iPSCs. TSC-iPSCs and unaffected control-iPSCs treated with rapamycin did not express pS6. Scale bar: 100  $\mu$ m.

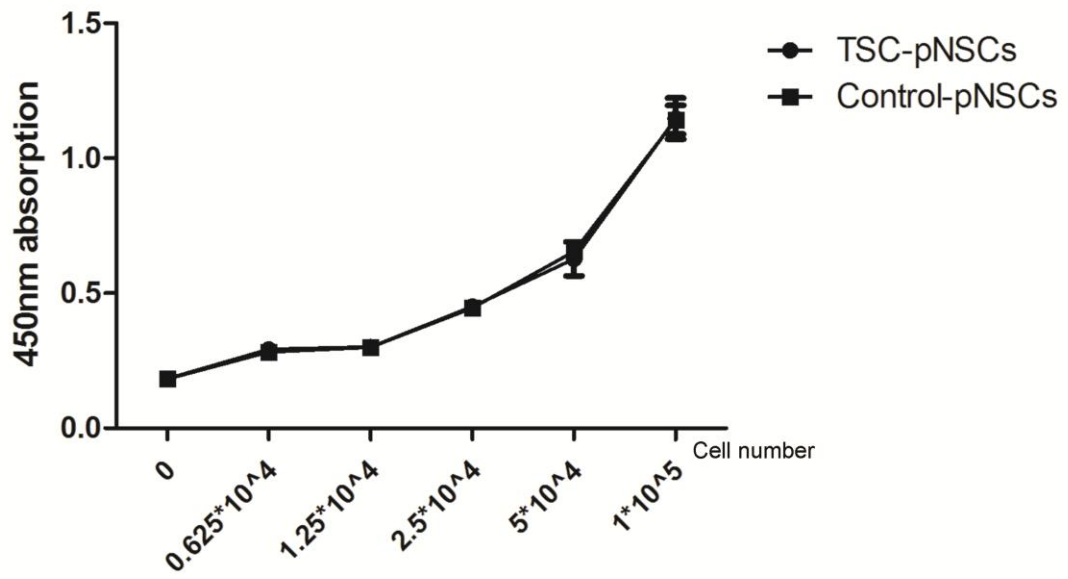

**Fig. S4 CCK8 standard curves for TSC and unaffected control pNSCs.**

The standard curve of CCK8 for TSC-pNSCs was consistent with that for unaffected control-pNSCs(TSC1 AND Control1 lines).



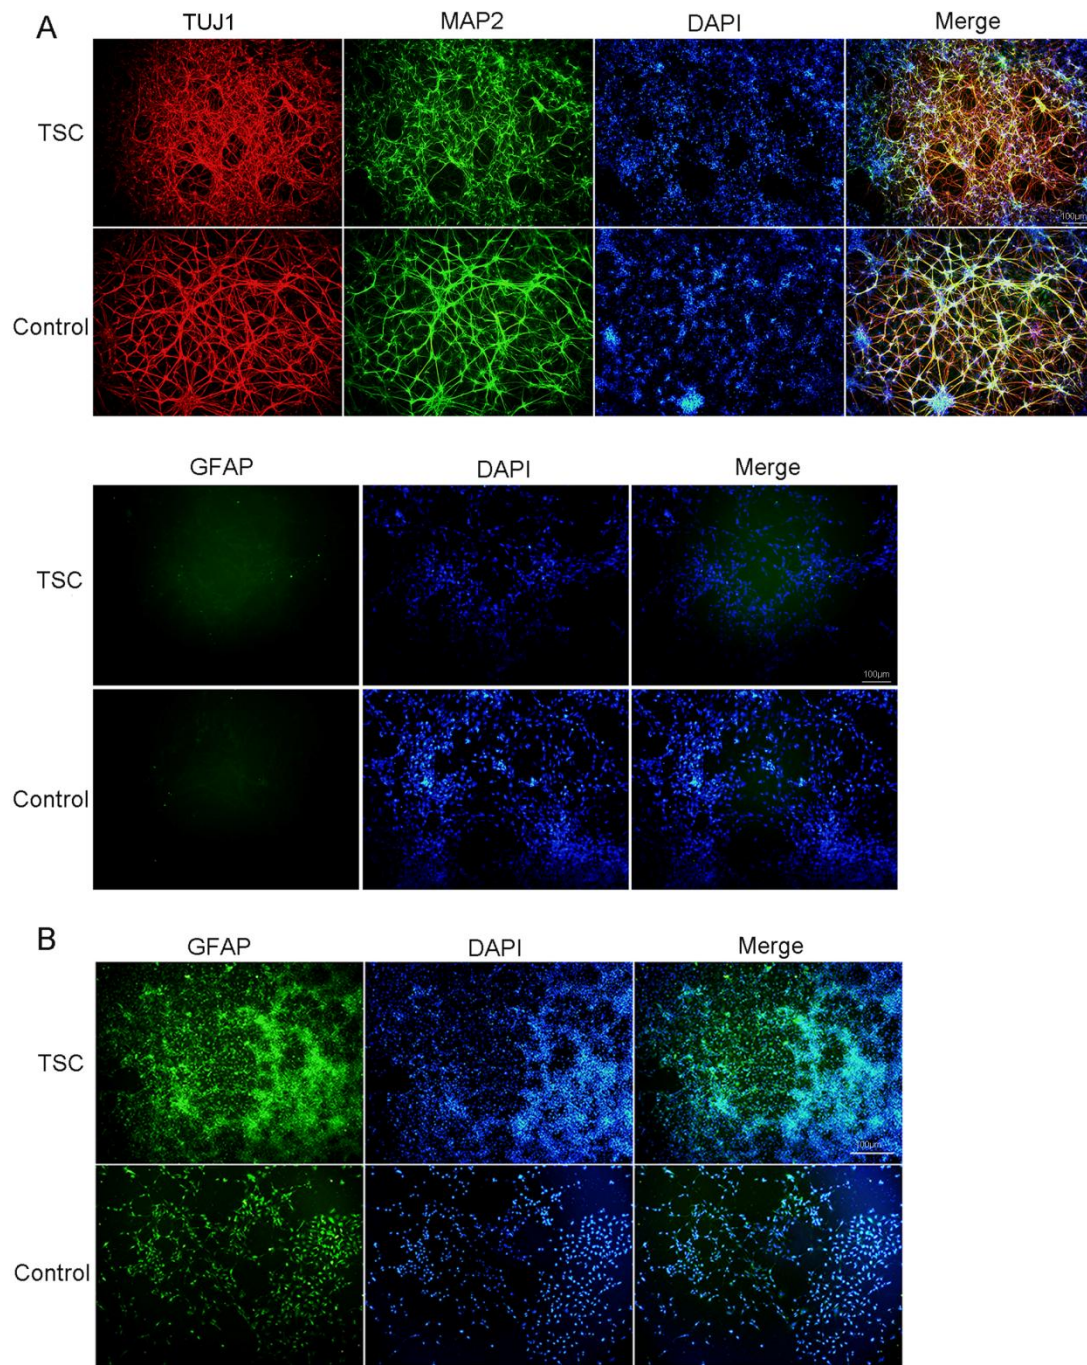

**Fig. S5. iPSCs can differentiate into neurons and astrocytes through neural progenitor cells.**

(A) Neurons derived from TSC and unaffected control-pNSCs expressed TUJ1 and MAP2, but were devoid of GFAP by immunohistochemistry analysis. (B) Astrocytes derived from TSC and unaffected control-pNSCs expressed GFAP. Scale bar: 100  $\mu$ m.

## **Experimental procedures**

### *Mutation analysis*

DNA was extracted from the TSC and unaffected control iPSCs and pNSCs (TSC1 and Control1) using a Blood/Cell/Tissue DNA Extraction Kit (Tiangen, Beijing, China). The subsequent procedures are described in the experimental procedures section of the manuscript.

### *Identification of abnormal TSC2 splicing*

Total RNA was extracted from cells using RNAiso (Takara Bio, Otsu, Japan) according to the manufacturer's protocol and cDNA was prepared using PrimeScript™ RT Master Mix (Takara Bio). RT-PCR was performed using Tli RNaseH Plus SYBR® Premix Ex Taq (Takara Bio) and the following primer sets: Set 1: Exon13F: ATAGAGCGCAGTCCATCCAC; Exon 16R: AGGACGGCTGTCTTCACATC; Set 2: Exon13F: ATAGAGCGCAGTCCATCCAC; Intron14R: CACAAGGGAGGCCAATGAG; Set 3: Exon 16R: AGGACGGCTGTCTTCACATC; Intron 14F: CTCATTGGCCTCCCTTGTG. The cDNA sequences with RT-PCR products were verified by Sanger sequencing.

### *Immunoblotting*

Western blotting of TSC patient-specific and unaffected controls' pNSCs was performed as described previously. The primary antibodies used were rabbit anti-Tuberin-N, anti-Tuberin-C, and anti-GAPDH (all from Cell Signaling, cat#3635s, 4308s, 2118s, Danvers, MA, USA). Reactive proteins were visualized using an ImageQuant™ LAS 4000 mini system (GE Healthcare, Little Chalfont, UK).

### *Immunofluorescence*

Immunofluorescence staining of neurons and astrocytes was performed as described in the experimental procedures section of the manuscript. The primary antibodies used were as follows: rabbit anti-β-III-Tubulin (TUJ1; Abcam, cat#ab18207, Cambridge, UK); rabbit anti-MAP2 (Abcam, cat#ab11267, Cambridge, UK), rabbit anti-GFAP (Abcam, cat#ab7260, Cambridge, UK).

### *CCK8*

For CCK8 detection, pNSCs from the TSC patient and unaffected controls were plated in a 96-well plate at a density of  $0.625 \times 10^4$ ,  $1.25 \times 10^4$ ,  $2.5 \times 10^4$ ,  $5 \times 10^4$ , or  $1 \times 10^5$  cells/100 μL/well in a humidified incubator containing 5% CO<sub>2</sub> for 6 h. Ten microliters of CCK8 was added to the 100 μL of cultured cells. After 2 h of incubation at 37°C in a humidified incubator containing 5% CO<sub>2</sub>, the absorbance was detected at a wavelength of 450 nm.
